# Supplementary material for: Effectiveness of double checking to reduce medication administration errors: a systematic review
Source: PubMed Central journal article supplement — BMJ Qual Saf. 2019 Aug 7;29(7):595–603. doi: 10.1136/bmjqs-2019-009552 (PMC7362775; doi:10.1136/bmjqs-2019-009552), 2019-08-07
Supplement: bmjqs-2019-009552supp001.pdf [file bmjqs-2019-009552supp001.pdf]

**eTable 1** - Search Strategy for MEDLINE, Embase, Ovid@Journals

|               |                                                                                                                                                                                                                                                                                                                                                                                                                                                                                                                                                                                                                                                                                                                                                                                                                                                                                                                                                                                                                                                                                                                                                       |
|---------------|-------------------------------------------------------------------------------------------------------------------------------------------------------------------------------------------------------------------------------------------------------------------------------------------------------------------------------------------------------------------------------------------------------------------------------------------------------------------------------------------------------------------------------------------------------------------------------------------------------------------------------------------------------------------------------------------------------------------------------------------------------------------------------------------------------------------------------------------------------------------------------------------------------------------------------------------------------------------------------------------------------------------------------------------------------------------------------------------------------------------------------------------------------|
| DATABASES     | MEDLINE, EMBASE, Ovid@Journals                                                                                                                                                                                                                                                                                                                                                                                                                                                                                                                                                                                                                                                                                                                                                                                                                                                                                                                                                                                                                                                                                                                        |
| SEARCH ENGINE | Ovid                                                                                                                                                                                                                                                                                                                                                                                                                                                                                                                                                                                                                                                                                                                                                                                                                                                                                                                                                                                                                                                                                                                                                  |
| DATE RUN      | Oct 5, 2018                                                                                                                                                                                                                                                                                                                                                                                                                                                                                                                                                                                                                                                                                                                                                                                                                                                                                                                                                                                                                                                                                                                                           |
| SEARCH LIMITS | Duplicates Removed                                                                                                                                                                                                                                                                                                                                                                                                                                                                                                                                                                                                                                                                                                                                                                                                                                                                                                                                                                                                                                                                                                                                    |
| STRATEGY      | (#1 OR (#2 AND #3)) AND #4                                                                                                                                                                                                                                                                                                                                                                                                                                                                                                                                                                                                                                                                                                                                                                                                                                                                                                                                                                                                                                                                                                                            |
| #1            | (double check\$3 or single check\$3).ti. or (double check\$3 or single check\$3).ab. or (double check\$3 or single check\$3).kf.                                                                                                                                                                                                                                                                                                                                                                                                                                                                                                                                                                                                                                                                                                                                                                                                                                                                                                                                                                                                                      |
| #2            | (check\$3 or verif* or confirm* or administer\$3 or dispens\$3).ti. or (check\$3 or verif* or confirm* or administer\$3 or dispens\$3).ab. or (check\$3 or verif* or confirm* or administer\$3 or dispens\$3).kf.                                                                                                                                                                                                                                                                                                                                                                                                                                                                                                                                                                                                                                                                                                                                                                                                                                                                                                                                     |
| #3            | (two nurses or two people or two person or two pharmacist* or two practition* or second person or second nurse or second pharmacist* or second practition*).ti. or (two nurses or two people or two person or two pharmacist* or two practition* or second person or second nurse or second pharmacist* or second practition*).ab. or (two nurses or two people or two person or two pharmacist* or two practition* or second person or second nurse or second pharmacist* or second practition*).kf.                                                                                                                                                                                                                                                                                                                                                                                                                                                                                                                                                                                                                                                 |
| #4            | (nursing or nurse\$1 or practitioner\$1 or pharmacist\$1 or pharmacy technician\$1 or medication error\$1 or drug error\$1 or dispensing error\$1 or administration error\$1 or medication safety or drug safety or drug administration\$1 or medication administration\$1 or drug preparation\$1 or medication preparation\$1 or drug dispensing or medication dispensing).ti. or (nursing or nurse\$1 or practitioner\$1 or pharmacist\$1 or pharmacy technician\$1 or medication error\$1 or drug error\$1 or dispensing error\$1 or administration error\$1 or medication safety or drug safety or drug administration\$1 or medication administration\$1 or drug preparation\$1 or medication preparation\$1 or drug dispensing or medication dispensing).ab. or (nursing or nurse\$1 or practitioner\$1 or pharmacist\$1 or pharmacy technician\$1 or medication error\$1 or drug error\$1 or dispensing error\$1 or administration error\$1 or medication safety or drug safety or drug administration\$1 or medication administration\$1 or drug preparation\$1 or medication preparation\$1 or drug dispensing or medication dispensing).kf. |

**eTable 2** - Search Strategy for CINAHL

|               |                                                                                                                                                                                                                                                                                                                                                                                                                                                                                                                                                                                                                                                                                                                                                                                                                                                                                                                                                                                                                                                                                                                                                                                                             |
|---------------|-------------------------------------------------------------------------------------------------------------------------------------------------------------------------------------------------------------------------------------------------------------------------------------------------------------------------------------------------------------------------------------------------------------------------------------------------------------------------------------------------------------------------------------------------------------------------------------------------------------------------------------------------------------------------------------------------------------------------------------------------------------------------------------------------------------------------------------------------------------------------------------------------------------------------------------------------------------------------------------------------------------------------------------------------------------------------------------------------------------------------------------------------------------------------------------------------------------|
| DATABASES     | CINAHL                                                                                                                                                                                                                                                                                                                                                                                                                                                                                                                                                                                                                                                                                                                                                                                                                                                                                                                                                                                                                                                                                                                                                                                                      |
| SEARCH ENGINE | EBSCOHost                                                                                                                                                                                                                                                                                                                                                                                                                                                                                                                                                                                                                                                                                                                                                                                                                                                                                                                                                                                                                                                                                                                                                                                                   |
| DATE RUN      | Oct 5, 2018                                                                                                                                                                                                                                                                                                                                                                                                                                                                                                                                                                                                                                                                                                                                                                                                                                                                                                                                                                                                                                                                                                                                                                                                 |
| SEARCH LIMITS | None                                                                                                                                                                                                                                                                                                                                                                                                                                                                                                                                                                                                                                                                                                                                                                                                                                                                                                                                                                                                                                                                                                                                                                                                        |
| STRATEGY      | (#1 OR (#2 AND #3)) AND #4                                                                                                                                                                                                                                                                                                                                                                                                                                                                                                                                                                                                                                                                                                                                                                                                                                                                                                                                                                                                                                                                                                                                                                                  |
| #1            | TI ("double check*" OR "single check*") OR<br>AB ("double check*" OR "single check*") OR<br>MW ("double check*" OR "single check*")                                                                                                                                                                                                                                                                                                                                                                                                                                                                                                                                                                                                                                                                                                                                                                                                                                                                                                                                                                                                                                                                         |
| #2            | TI (check OR checked OR checking OR administer* OR dispens* OR<br>verif* OR confirm*) OR<br>AB (check OR checked OR checking OR administer* OR dispens* OR<br>verif* OR confirm*) OR<br>MW (check OR checked OR checking OR administer* OR dispens* OR<br>verif* OR confirm*)                                                                                                                                                                                                                                                                                                                                                                                                                                                                                                                                                                                                                                                                                                                                                                                                                                                                                                                               |
| #3            | TI ("two nurses" OR "two people" OR "two person" OR "second<br>person" OR "second nurse" OR "two pharmacist*" OR "two<br>practitioner*" OR "second pharmacist*" OR "second practitioner*")<br>OR AB ("two nurses" OR "two people" OR "two person" OR "second<br>person" OR "second nurse" OR "two pharmacist*" OR "two<br>practitioner*" OR "second pharmacist*" OR "second practitioner*")<br>OR MW ("two nurses" OR "two people" OR "two person" OR "second<br>person" OR "second nurse" OR "two pharmacist*" OR "two<br>practitioner*" OR "second pharmacist*" OR "second practitioner*")                                                                                                                                                                                                                                                                                                                                                                                                                                                                                                                                                                                                                |
| #4            | TI (nursing OR nurse# OR practitioner# OR pharmacist# OR "pharmacy<br>technician#" OR "medication error#" OR "drug error#" OR "dispensing<br>error#" OR "administration error#" OR "drug administration#" OR<br>"medication administration#" OR "drug preparation#" OR "medication<br>preparation#" OR "drug dispensing" OR "medication dispensing" OR<br>"drug safety" OR "medication safety") OR AB (nursing OR nurse# OR<br>practitioner# OR pharmacist# OR "pharmacy technician#" OR<br>"medication error#" OR "drug error#" OR "dispensing error#" OR<br>"administration error#" OR "drug administration#" OR "medication<br>administration#" OR "drug preparation#" OR "medication<br>preparation#" OR "drug dispensing" OR "medication dispensing" OR<br>"drug safety" OR "medication safety") OR MW (nursing OR nurse# OR<br>practitioner# OR pharmacist# OR "pharmacy technician#" OR<br>"medication error#" OR "drug error#" OR "dispensing error#" OR<br>"administration error#" OR "drug administration#" OR "medication<br>administration#" OR "drug preparation#" OR "medication<br>preparation#" OR "drug dispensing" OR "medication dispensing" OR<br>"drug safety" OR "medication safety") |

**eTable 3** - Search Strategy for OpenGrey

|               |                                                                                                                                                                                                                                                                                                                                                                                                                                                                                                                                                                                                                                                                                                       |
|---------------|-------------------------------------------------------------------------------------------------------------------------------------------------------------------------------------------------------------------------------------------------------------------------------------------------------------------------------------------------------------------------------------------------------------------------------------------------------------------------------------------------------------------------------------------------------------------------------------------------------------------------------------------------------------------------------------------------------|
| DATABASES     | OpenGrey                                                                                                                                                                                                                                                                                                                                                                                                                                                                                                                                                                                                                                                                                              |
| DATE RUN      | Oct 5, 2018                                                                                                                                                                                                                                                                                                                                                                                                                                                                                                                                                                                                                                                                                           |
| SEARCH LIMITS | None                                                                                                                                                                                                                                                                                                                                                                                                                                                                                                                                                                                                                                                                                                  |
| SEARCH TERMS  | ((("double check*" OR "single check*") OR ((check OR checked OR checking OR administer* OR dispens* OR verif* OR confirm*) AND ("two nurses" OR "two people" OR "two person" OR "second person" OR "second nurse" OR "two pharmacist*" OR "two practitioner*" OR "second pharmacist*" OR "second practitioner*"))) AND (nursing OR nurse* OR practitioner* OR pharmacist* OR "pharmacy technician*" OR "medication error*" OR "drug error*" OR "dispensing error*" OR "administration error*" OR "drug administration*" OR "medication administration*" OR "drug preparation*" OR "medication preparation*" OR "drug dispensing" OR "medication dispensing" OR "drug safety" OR "medication safety")) |
